# Supplementary material for: Cyanobacterial biofuels: new insights and strain design strategies revealed by computational modeling
Source: PubMed Central journal article supplement (PMC4180434; doi:10.1186/s12934-014-0128-x), 2014-09-19
Supplement: 12934_2014_128_MOESM1_ESM.pdf [file 12934_2014_128_MOESM1_ESM.pdf]

Additional file 1

# Cyanobacterial biofuels: new insights and engineering strategies revealed by computational modeling

Philipp Erdrich<sup>1</sup>, Henning Knoop<sup>2</sup>, Ralf Steuer<sup>2</sup>, Steffen Klamt<sup>1\*</sup>

**1** Max Planck Institute for Dynamics of Complex Technical Systems, Magdeburg, Germany

**2** Humboldt-University of Berlin, Institute for Theoretical Biology, Invalidenstrasse 43, 10115 Berlin, Germany

\* Email: [klamt@mpi-magdeburg.mpg.de](mailto:klamt@mpi-magdeburg.mpg.de)

Table S1: Mapping of reaction IDs used in the main text to reaction IDs used in the RN and GN model files.

| Reaction ID | Reaction ID (Model) | Reaction ID | Reaction ID (Model) |
|-------------|---------------------|-------------|---------------------|
| R1          | PR0004              | R20         | GM0016              |
| R2          | PR0006              | R21         | GM0017              |
| R3          | PR0014              | R22         | GM0025              |
| R4          | PR0018              | R23         | R20131              |
| R5          | Mehler              | R24         | R20132              |
| R6          | GE0010              | R25         | R20133              |
| R7          | FQR                 | R26         | PT0011              |
| R8          | PP0016              | R27         | PP0020              |
| R9          | TR0049              | R28         | PP0021              |
| R10         | PT0027              | R29         | EtOH-ex             |
| R11         | TR0053              | R30         | PT0009              |
| R12         | GE0009              | R31         | PDC                 |
| R13         | PT0026              | R32         | PT0001              |
| R14         | GS0043              | R33         | TR0003              |
| R15         | GS0042              | R34         | GS0006              |
| R16         | GS0041              | R35         | GE0001              |
| R17         | GS0040              | R36         | ST0016              |
| R18         | GM0010              | R37         | ST0014              |
| R19         | GM0011              | R38         | PP0024              |
